# Supplementary material for: Nanobubble and nanodroplet template growth of particle nanorings versus nanoholes in drying nanofluids and polymer films
Source: Royal Society of Chemistry journal article supplement (doi:10.1039/c0nr00750a), 2011-01-01
Supplement: c0nr00750a.pdf [file c0nr00750a.pdf]

## Electronic Supplementary information

**Ellipsometry.** Film thicknesses were determined by null-ellipsometry (Multiskop, Optrel, Berlin, Germany). All measurements were done under ambient conditions at 70° angle of incidence using a Nd-YAG laser ( $\lambda = 532$  nm), and the data fit for the film thickness and optical properties were performed using the Elli software (Optrel). The refractive index,  $n$ , and absorption coefficient,  $k$ , of the substrate were determined from silicon surfaces using a 2-layers model (air/substrate). The thickness of the SAM film was then determined using a 3-layers model (air/film/substrate), and assuming that film optical constants were  $n = 1.46$  and  $k = 0$ .

**Atomic Force Microscopy.** Surface images were acquired with an atomic force microscope in Tapping mode powered by a Nanoscope IV controller (Digital Instruments, Santa Barbara, CA) using Silicon AFM tips (Nanosensor, Park Scientific) with a spring constant of  $k = 20$  N m<sup>-1</sup>.

**Transmission Electron Microscopy.** The size and morphology of nanoparticles were analyzed by transmission electron microscopy (TEM) with a Philips CM 200 at an accelerating voltage of 200 kV. TEM samples were prepared by dipping 400 mesh carbon-coated copper grids into an aqueous suspension of nanoparticles, and air dried for 24 h prior to analysis.
